# Supplementary material
Source: Research Square preprint supplement (doi:10.21203/rs.3.rs-8552120/v1)
Supplement: Supplementary file 1 [file e3e6c3857ef7c5b8febfff69.xlsx]

## Sheet: Sheet1
ID
